# Supplementary material for: Functional health and symptoms in Spain before and during the COVID-19 pandemic
Source: Springer Nature journal article supplement (doi:10.1186/s12889-021-10899-2), 2021-05-01
Supplement: MOESM1 [file 19124328]

Supplement (1) to "Functional health and symptoms in Spain before and during the COVID-19 pandemic" by Lehmann et al. 2021 at BMC Public Health

This supplement gives an English translation (original language: Spanish) to the sociodemographic questionnaire that was constructed for this study. Questions or answer options that are marked with grey color were present only in the second assessment (in 2020).

| Question                                                                     | Possible answers                                                                                                                                                                                                                                                                                                                                                                                                                                     |
|------------------------------------------------------------------------------|------------------------------------------------------------------------------------------------------------------------------------------------------------------------------------------------------------------------------------------------------------------------------------------------------------------------------------------------------------------------------------------------------------------------------------------------------|
| Are you male or female?                                                      | Male<br>Female                                                                                                                                                                                                                                                                                                                                                                                                                                       |
| How old are you (in years)?                                                  | (participants enter an integer number)                                                                                                                                                                                                                                                                                                                                                                                                               |
| What is your highest education or training?                                  | Compulsory or less<br>Spanish baccalaureate<br>Vocational education<br>Non-university diploma<br>University degree<br>Postgraduate degree                                                                                                                                                                                                                                                                                                            |
| Do you have any, or have you had any of the following (tick all that apply)? | Asthma, emphysema or chronic bronchitis<br><br>Arthritis or rheumatism<br>Cancer diagnosed in the last 3 years<br>Diabetes<br>Digestive problems (such as ulcer, colitis or gallbladder disease)<br>Heart problems (such as angina pectoris, congestive heart failure or coronary artery disease)<br>HIV/AIDS<br>Renal disease<br>Liver problems (such as cirrhosis)<br>Stroke<br>Mental illness (such as depression)<br>Stroke<br>None of the above |
| What is your relationship status?                                            | Single<br>Married<br>Divorced<br>Widowed<br>Long-term relationship (but not married)                                                                                                                                                                                                                                                                                                                                                                 |
| Do you live alone?                                                           | Yes<br>No                                                                                                                                                                                                                                                                                                                                                                                                                                            |
| Do you live with your children?                                              | Yes<br>No                                                                                                                                                                                                                                                                                                                                                                                                                                            |
| Do you live with your spouse/partner?                                        | Yes<br>No                                                                                                                                                                                                                                                                                                                                                                                                                                            |

|                                         |                                                                                                                                                                                                                                                                       |
|-----------------------------------------|-----------------------------------------------------------------------------------------------------------------------------------------------------------------------------------------------------------------------------------------------------------------------|
| Do you live with your parents?          | Yes<br>No                                                                                                                                                                                                                                                             |
| Do you live with other family?          | Yes<br>No                                                                                                                                                                                                                                                             |
| What is your current employment status? | Employed (full time)<br>Employed (full time, currently teleworking)<br>Employed (part time)<br>Employed (part time, currently teleworking)<br>Unemployed<br>Lost my job due to COVID-19<br>Houseworker<br>Retired<br>On sick leave<br>In training or student<br>Other |

|                                                                                      |                                                                                                                                                                                                                                                                                        |
|--------------------------------------------------------------------------------------|----------------------------------------------------------------------------------------------------------------------------------------------------------------------------------------------------------------------------------------------------------------------------------------|
| How many square meters does your apartment/house have (including garden or balcony)? | (participants enter an integer number)                                                                                                                                                                                                                                                 |
| How many persons live in your apartment/house?                                       | (participants enter an integer number)                                                                                                                                                                                                                                                 |
| Does your apartment/house have a garden or balcony?                                  | Yes<br>No                                                                                                                                                                                                                                                                              |
| Social distancing                                                                    | No social distancing<br>Moderate social distancing (reduction of contact with other people, work at the workplace if applicable)<br>Strong social distancing (I only leave home for essential tasks such as shopping, doctor's visits, teleworking if necessary)<br>I am in quarantine |
| Are you burdened by the current situation caused by Covid-19?                        | Not at all<br>A little<br>Quite a bit<br>Very much                                                                                                                                                                                                                                     |
| Have you been tested for Covid-19?                                                   | No<br>Yes, with a negative result (I don't have COVID-19)<br>Yes, with a positive result (I have COVID-19)<br>Yes, but I am still waiting for the results                                                                                                                              |
